# Supplementary material
Source: publisher figshare collection journal article supplement (https://gsajournals.figshare.com/ndownloader/files/27379304)
Supplement: Supplementary file 1 [file 27379304]

## Sheet: Table S6
Supplementary Data 6. Association analysis for TE-InDels and the SNPs nearby
Marker	Chromosome	Position(bp)	F	p-value	-LOG10(p-value)	InDel sort
chr1.S_52626794	1	52626794	1.16449	0.282682	0.548702
chr1.S_52626995	1	52626995	0.847747	0.35856	0.445439
chr1.S_52627001	1	52627001	0.868526	0.35275	0.452532
chr1.S_52627046	1	52627046	0.171598	0.67925	0.16797
chr1.S_52627097	1	52627097	0.0435511	0.83499	0.0783187
chr1.S_52627098	1	52627098	0.000387513	0.98432	0.00686353
chr1.S_52627099	1	52627099	0.00297596	0.956567	0.0192847
chr1.S_52627101	1	52627101	0.037881	0.845946	0.0726576
chr1.S_52627107	1	52627107	0.643083	0.423801	0.372838
b0052	1	52627754	3.70763	0.0571547	1.24295	1/11
chr1.S_52629300	1	52629300	1.01119	0.316165	0.500086
chr1.S_55382221	1	55382221	0.336988	0.562578	0.249817
chr1.S_55382257	1	55382257	3.5966	0.060134	1.22088
chr1.S_55382259	1	55382259	0.133474	0.715451	0.14542
chr1.S_55382392	1	55382392	1.87237	0.173826	0.759886
chr1.S_55382413	1	55382413	0.0772942	0.781481	0.107082
chr1.S_55382918	1	55382918	0.459699	0.498969	0.301926
chr1.S_55384085	1	55384085	1.10848	0.294763	0.530527
chr1.S_55384087	1	55384087	6.84148	0.0101117	1.99518
chr1.S_55384314	1	55384314	1.78515	0.184353	0.734349
chr1.S_55384358	1	55384358	1.93439	0.167012	0.777252
chr1.S_55385333	1	55385333	0.489273	0.485502	0.313809
chr1.S_55385565	1	55385565	0.400406	0.527991	0.277373
chr1.S_55385714	1	55385714	10.5725	0.00146211	2.83502
chr1.S_55385793	1	55385793	13.1911	0.000403471	3.39419
chr1.S_55385823	1	55385823	3.59278	0.0602511	1.22004
chr1.S_55385855	1	55385855	5.77764	0.0176424	1.75344
chr1.S_55385886	1	55385886	3.59278	0.0602511	1.22004
chr1.S_55385932	1	55385932	3.59278	0.0602511	1.22004
chr1.S_55385956	1	55385956	1.77995e-05	0.99664	0.00146158
chr1.S_55385961	1	55385961	5.77764	0.0176424	1.75344
chr1.S_55386011	1	55386011	0.185059	0.667773	0.175371
chr1.S_55386022	1	55386022	1.77995e-05	0.99664	0.00146158
chr1.S_55386028	1	55386028	5.77764	0.0176424	1.75344
chr1.S_55386029	1	55386029	5.77764	0.0176424	1.75344
chr1.S_55386045	1	55386045	13.2871	0.000390459	3.40842
chr1.S_55386637	1	55386637	9.00635	0.00322635	2.49129
chr1.S_55386794	1	55386794	1.69642	0.195059	0.709833
chr1.S_55386821	1	55386821	1.50049	0.222811	0.652064
b0057	1	55387195	8.20045	0.00497178	2.30349	23/100
chr1.S_55388236	1	55388236	0.687041	0.409127	0.388142
chr1.S_55388242	1	55388242	0.409194	0.523588	0.28101
chr1.S_55388244	1	55388244	0.629556	0.429111	0.367431
chr1.S_55388264	1	55388264	0.69196	0.407036	0.390367
chr1.S_55388265	1	55388265	0.69196	0.407036	0.390367
chr1.S_55388317	1	55388317	3.36373	0.0692553	1.15955
chr1.S_55388318	1	55388318	3.18997	0.0767497	1.11492
chr1.S_55388320	1	55388320	0.98291	0.323805	0.489717
chr1.S_55388321	1	55388321	1.39412	0.240512	0.618864
chr1.S_55388322	1	55388322	3.66742	0.0582598	1.23463
chr1.S_55388362	1	55388362	2.32667	0.130044	0.88591
chr1.S_55388394	1	55388394	15.3396	0.000144322	3.84067
chr1.S_55388396	1	55388396	0.474298	0.492253	0.307811
chr1.S_55388397	1	55388397	0.474298	0.492253	0.307811
chr1.S_55388398	1	55388398	2.31485	0.130573	0.884148
chr1.S_55388419	1	55388419	0.474298	0.492253	0.307811
chr1.S_55388460	1	55388460	6.40933	0.0125526	1.90127
chr1.S_55388566	1	55388566	0.474298	0.492253	0.307811
chr1.S_55388567	1	55388567	0.474298	0.492253	0.307811
chr1.S_55388700	1	55388700	3.59025	0.0603402	1.21939
chr1.S_55388810	1	55388810	1.36802	0.244293	0.61209
chr1.S_55388825	1	55388825	3.59025	0.0603402	1.21939
chr1.S_55389008	1	55389008	2.03957	0.155651	0.807849
chr1.S_55389071	1	55389071	14.9054	0.000177314	3.75126
chr1.S_55389098	1	55389098	1.36841	0.244226	0.612208
chr1.S_55389149	1	55389149	1.36841	0.244226	0.612208
chr1.S_55389155	1	55389155	0.378956	0.539239	0.268219
chr1.S_55389170	1	55389170	1.36841	0.244226	0.612208
chr1.S_55389222	1	55389222	7.50742	0.00700861	2.15437
chr1.S_55389236	1	55389236	19.3914	2.2021e-05	4.65716
chr1.S_55389251	1	55389251	3.32469	0.0705442	1.15154
chr1.S_55389603	1	55389603	12.0151	0.000715685	3.14528
chr1.S_55389604	1	55389604	7.35388	0.0075971	2.11935
chr1.S_55389746	1	55389746	19.3914	2.2021e-05	4.65716
chr1.S_55389827	1	55389827	0.0162294	0.898825	0.0463249
chr1.S_55389872	1	55389872	5.23422	0.0237615	1.62413
chr1.S_55389911	1	55389911	2.0033	0.159348	0.797653
chr1.S_55390037	1	55390037	17.0535	6.45859e-05	4.18986
chr1.S_55390115	1	55390115	17.0535	6.45859e-05	4.18986
chr1.S_55390166	1	55390166	9.47081	0.00254657	2.59404
chr1.S_55390193	1	55390193	3.59025	0.0603402	1.21939
chr1.S_55390212	1	55390212	9.47081	0.00254657	2.59404
chr1.S_55390565	1	55390565	0.80722	0.370605	0.431089
chr1.S_55390577	1	55390577	8.97419	0.00327985	2.48415
chr1.S_55390589	1	55390589	3.59025	0.0603402	1.21939
chr1.S_55390628	1	55390628	17.0535	6.45859e-05	4.18986
chr1.S_55390658	1	55390658	1.18491	0.278372	0.555375
chr1.S_55390686	1	55390686	13.5619	0.000337299	3.47198
chr1.S_55390742	1	55390742	9.28106	0.00280446	2.55215
chr1.S_55390784	1	55390784	3.27008	0.0728655	1.13748
chr1.S_55390817	1	55390817	3.64655	0.0583889	1.23367
chr1.S_55390841	1	55390841	14.2116	0.00024686	3.60755
chr1.S_55390955	1	55390955	0.626115	0.430225	0.366304
chr1.S_55390958	1	55390958	0.626115	0.430225	0.366304
chr1.S_55390979	1	55390979	0.88189	0.349426	0.456645
chr1.S_55391054	1	55391054	0.88189	0.349426	0.456645
chr1.S_55391133	1	55391133	3.59025	0.0603402	1.21939
chr1.S_55391143	1	55391143	4.34363	0.0391055	1.40776
chr1.S_55391147	1	55391147	0.667859	0.415294	0.381644
chr1.S_55391159	1	55391159	4.34363	0.0391055	1.40776
chr1.S_55391181	1	55391181	17.0535	6.45859e-05	4.18986
chr1.S_55391182	1	55391182	9.43	0.00259989	2.58504
chr1.S_55391193	1	55391193	17.244	6.15285e-05	4.21092
chr1.S_55391247	1	55391247	0.598965	0.440378	0.356174
chr1.S_55391282	1	55391282	9.43	0.00259989	2.58504
chr1.S_55391306	1	55391306	0.633577	0.427777	0.368783
chr1.S_55391307	1	55391307	0.187759	0.665637	0.176763
chr1.S_55391308	1	55391308	0.173968	0.677361	0.16918
chr1.S_55391309	1	55391309	0.207665	0.649407	0.187483
chr1.S_55391338	1	55391338	2.09779	0.150737	0.821781
chr1.S_55391818	1	55391818	0.547553	0.460653	0.336626
chr2.S_6153164	2	6153164	0.33328	0.564882	0.248042
chr2.S_6153168	2	6153168	0.000981225	0.975066	0.0109658
chr2.S_6153245	2	6153245	4.68555e-05	0.99455	0.00237355
chr2.S_6153313	2	6153313	1.57693	0.211939	0.673789
chr2.S_6153347	2	6153347	0.211934	0.646056	0.18973
chr2.S_6153461	2	6153461	0.375773	0.540997	0.266805
chr2.S_6153462	2	6153462	0.558808	0.456156	0.340886
chr2.S_6153475	2	6153475	0.972292	0.326029	0.486743
chr2.S_6153509	2	6153509	0.589079	0.444296	0.352328
chr2.S_6153540	2	6153540	0.0329146	0.856381	0.0673327
chr2.S_6153672	2	6153672	0.0426473	0.836759	0.0773995
chr2.S_6153803	2	6153803	0.410115	0.523174	0.281354
chr2.S_6154009	2	6154009	3.08112	0.0819648	1.08637
chr2.S_6154051	2	6154051	0.280038	0.598106	0.223222
chr2.S_6154097	2	6154097	0.445594	0.505675	0.296128
chr2.S_6154118	2	6154118	0.515627	0.474022	0.324202
chr2.S_6154163	2	6154163	0.6448	0.423502	0.373145
chr2.S_6154325	2	6154325	0.385838	0.535583	0.271173
chr2.S_6154675	2	6154675	3.65054	0.0583053	1.23429
chr2.S_6154676	2	6154676	3.84974	0.0519757	1.2842
chr2.S_6154682	2	6154682	2.70862	0.102424	0.989597
chr2.S_6154683	2	6154683	0.761896	0.384383	0.415236
chr2.S_6154686	2	6154686	1.1891	0.277575	0.55662
chr2.S_6154706	2	6154706	0.00866905	0.925961	0.0334072
chr2.S_6154707	2	6154707	2.50943	0.115634	0.936914
chr2.S_6154783	2	6154783	1.63558	0.203264	0.691939
chr2.S_6154826	2	6154826	0.221694	0.638573	0.19479
chr2.S_6155589	2	6155589	0.00153042	0.968858	0.01374
chr2.S_6155598	2	6155598	0.004602	0.946022	0.0240987
chr2.S_6155649	2	6155649	0.0269933	0.86977	0.0605957
chr2.S_6155670	2	6155670	0.00341458	0.953502	0.0206783
chr2.S_6155700	2	6155700	0.136148	0.71277	0.147051
chr2.S_6155748	2	6155748	0.00632586	0.936737	0.0283822
b0222	2	6158129	3.0126	0.0885425	1.05285	4/34
chr2.S_17861938	2	17861938	0.658225	0.419427	0.377344
chr2.S_17861939	2	17861939	0.240187	0.625056	0.204081
chr2.S_17861940	2	17861940	0.939188	0.334897	0.475089
chr2.S_17861944	2	17861944	0.715155	0.399885	0.398065
chr2.S_17862144	2	17862144	0.224635	0.636454	0.196233
chr2.S_17862180	2	17862180	1.00841	0.317809	0.497833
chr2.S_17862353	2	17862353	0.0691878	0.793011	0.100721
chr2.S_17862395	2	17862395	1.354	0.247465	0.606487
chr2.S_17862410	2	17862410	1.38678	0.241801	0.616541
chr2.S_17862428	2	17862428	1.19702	0.276422	0.558427
chr2.S_17862535	2	17862535	2.63106	0.108072	0.966287
chr2.S_17862557	2	17862557	1.66482	0.200119	0.698711
chr2.S_17862588	2	17862588	2.74105	0.101	0.99568
chr2.S_17862612	2	17862612	2.78043	0.098615	1.00606
chr2.S_17862618	2	17862618	2.57297	0.111922	0.951086
chr2.S_17862883	2	17862883	0.927144	0.338025	0.471051
chr2.S_17862913	2	17862913	0.595059	0.442364	0.35422
chr2.S_17862918	2	17862918	0.761013	0.385123	0.414401
chr2.S_17862919	2	17862919	0.26673	0.60659	0.217105
chr2.S_17863065	2	17863065	5.27775	0.0240283	1.61928
chr2.S_17863215	2	17863215	0.362308	0.549043	0.260394
chr2.S_17863252	2	17863252	0.59825	0.441555	0.355015
chr2.S_17863284	2	17863284	3.63077	0.0610129	1.21458
chr2.S_17863431	2	17863431	0.504097	0.479222	0.319463
chr2.S_17863467	2	17863467	1.38407	0.242814	0.614727
chr2.S_17863493	2	17863493	1.27886	0.261764	0.582091
chr2.S_17863554	2	17863554	0.549226	0.46063	0.336648
chr2.S_17863650	2	17863650	4.10784	0.0458566	1.3386
chr2.S_17863890	2	17863890	11.5149	0.00101596	2.99312
chr2.S_17863956	2	17863956	0.810938	0.370888	0.430758
chr2.S_17864027	2	17864027	0.00369634	0.951638	0.0215281
chr2.S_17864227	2	17864227	0.506228	0.478484	0.320133
chr2.S_17864252	2	17864252	10.79	0.00155281	2.80888
chr2.S_17864331	2	17864331	6.06363	0.0156408	1.80574
chr2.S_17864447	2	17864447	1.22708	0.270659	0.567577
chr2.S_17864675	2	17864675	0.573219	0.451946	0.344914
chr2.S_17864717	2	17864717	0.777726	0.379743	0.42051
chr2.S_17864721	2	17864721	0.257941	0.612537	0.212868
chr2.S_17864747	2	17864747	1.65024	0.201836	0.695002
chr2.S_17864753	2	17864753	0.257941	0.612537	0.212868
chr2.S_17864805	2	17864805	0.0358422	0.850229	0.0704639
chr2.S_17864855	2	17864855	1.35628	0.246774	0.607701
chr2.S_17864898	2	17864898	0.896774	0.345782	0.461198
chr2.S_17864906	2	17864906	0.0567481	0.812163	0.0903568
chr2.S_17864919	2	17864919	1.18912	0.27789	0.556128
chr2.S_17864922	2	17864922	0.0168049	0.897127	0.0471458
chr2.S_17865348	2	17865348	2.70624	0.103296	0.985916
b0256	2	17866171	0.00641895	0.936354	0.02856	66/67
chr2.S_17866617	2	17866617	1.03497	0.311246	0.506896
chr2.S_17866648	2	17866648	1.03497	0.311246	0.506896
chr2.S_17867677	2	17867677	0.278001	0.599182	0.222441
chr2.S_17867863	2	17867863	1.09743	0.297283	0.52683
chr2.S_17867869	2	17867869	1.15126	0.286003	0.54363
chr2.S_17868253	2	17868253	0.986111	0.323	0.490798
chr2.S_17868773	2	17868773	1.5441	0.217067	0.663407
chr2.S_17868890	2	17868890	0.267602	0.60616	0.217413
chr2.S_17869126	2	17869126	1.98977	0.161532	0.791743
chr2.S_17869158	2	17869158	2.33075	0.130029	0.885959
chr2.S_17869180	2	17869180	1.0599	0.306027	0.514241
chr2.S_17869204	2	17869204	0.664882	0.417204	0.379652
chr2.S_17869469	2	17869469	0.013975	0.906118	0.0428151
chr2.S_17869490	2	17869490	0.586638	0.44544	0.35121
chr2.S_17870157	2	17870157	0.959645	0.329765	0.481796
chr2.S_17870319	2	17870319	1.74366	0.18969	0.721954
chr2.S_17870388	2	17870388	0.183875	0.668986	0.174583
chr2.S_17870754	2	17870754	3.35608	0.0696147	1.1573
chr2.S_17871135	2	17871135	0.446988	0.505602	0.296191
chr2.S_33679164	2	33679164	0.126375	0.722825	0.140967
chr2.S_33679225	2	33679225	14.1309	0.000257353	3.58947
chr2.S_33679234	2	33679234	0.00117957	0.972656	0.0120409
chr2.S_33679284	2	33679284	14.1309	0.000257353	3.58947
chr2.S_33679336	2	33679336	2.7381	0.101025	0.99557
chr2.S_33679342	2	33679342	15.3133	0.000147653	3.83076
b0264	2	33679736	8.53541	0.00425704	2.37089	8/16
chr2.S_33680126	2	33680126	1.03413	0.311574	0.506438
chr2.S_33680630	2	33680630	0.00205184	0.964021	0.0159136
chr2.S_33680664	2	33680664	14.1309	0.000257353	3.58947
chr2.S_33680676	2	33680676	14.1309	0.000257353	3.58947
chr2.S_33680762	2	33680762	18.9183	2.7463e-05	4.56125
chr2.S_33680817	2	33680817	17.1486	6.17917e-05	4.20907
chr2.S_33681158	2	33681158	6.38315	0.0127695	1.89383
chr2.S_33681171	2	33681171	5.2751	0.023283	1.63296
chr2.S_33681180	2	33681180	0.557841	0.456501	0.340558
chr2.S_177509705	2	177509705	10.8741	0.00132778	2.87687
chr2.S_177509902	2	177509902	1.56729	0.213774	0.670045
chr2.S_177509963	2	177509963	17.0654	6.42288e-05	4.19227
chr2.S_177510000	2	177510000	1.16555	0.282347	0.549216
chr2.S_177510003	2	177510003	1.18406	0.278766	0.55476
chr2.S_177510294	2	177510294	25.7674	1.63551e-06	5.78635
chr2.S_177510436	2	177510436	22.2207	7.42761e-06	5.12915
chr2.S_177510479	2	177510479	6.41393	0.0126829	1.89678
b0300	2	177510731	34.1638	3.1885e-12	11.4964	1/9
chr2.S_203596016	2	203596016	1.20554	0.274246	0.56186
chr2.S_203596019	2	203596019	1.56826	0.212726	0.67218
chr2.S_203596034	2	203596034	26.6057	9.15996e-07	6.03811
chr2.S_203596127	2	203596127	1.18811	0.277728	0.556381
chr2.S_203596693	2	203596693	0.21119	0.646604	0.189362
chr2.S_203596879	2	203596879	1.18811	0.277728	0.556381
chr2.S_203597385	2	203597385	0.299903	0.58579	0.232258
chr2.S_203598294	2	203598294	1.04182	0.309308	0.509608
chr2.S_203598460	2	203598460	29.0714	3.24626e-07	6.48862
chr2.S_203599484	2	203599484	0.0697159	0.792189	0.101171
chr2.S_203599607	2	203599607	2.02212	0.157513	0.802684
chr2.S_203599647	2	203599647	0.21119	0.646604	0.189362
chr2.S_203599684	2	203599684	4.69787	0.0321265	1.49314
chr2.S_203599820	2	203599820	5.15219	0.0249026	1.60376
chr2.S_203599856	2	203599856	2.31581	0.130512	0.884349
chr2.S_203599862	2	203599862	3.25938	0.0733851	1.13439
chr2.S_203599871	2	203599871	6.34579	0.0129782	1.88679
chr2.S_203599991	2	203599991	2.39824	0.12398	0.906647
chr2.S_203600116	2	203600116	10.415	0.00174409	2.75843
chr2.S_203600310	2	203600310	15.6429	0.000125951	3.8998
chr2.S_203600357	2	203600357	14.4808	0.000231272	3.63588
chr2.S_203600648	2	203600648	11.7318	3.04363e-05	4.51661
chr2.S_203600905	2	203600905	0.00505007	0.943506	0.0252551
chr2.S_203600907	2	203600907	1.03179	0.311669	0.506306
chr2.S_203600952	2	203600952	2.61172	0.10852	0.964491
chr2.S_203600953	2	203600953	0.00264258	0.959093	0.0181394
chr2.S_203601011	2	203601011	2.40753	0.123184	0.909446
chr2.S_203601031	2	203601031	2.71946	0.101584	0.993175
chr2.S_203601142	2	203601142	2.43477	0.121799	0.914356
chr2.S_203601248	2	203601248	25.8553	1.25434e-06	5.90158
chr2.S_203601399	2	203601399	7.66879	0.00644736	2.19062
chr2.S_203601407	2	203601407	8.06455	0.00524081	2.2806
chr2.S_203601447	2	203601447	8.06455	0.00524081	2.2806
chr2.S_203601456	2	203601456	7.66879	0.00644736	2.19062
chr2.S_203601468	2	203601468	0.0040405	0.949442	0.0225314
chr2.S_203601475	2	203601475	10.1863	0.00186214	2.72999
chr2.S_203601553	2	203601553	7.34886	0.00762439	2.11779
chr2.S_203601716	2	203601716	27.8696	5.28962e-07	6.27658
chr2.S_203601759	2	203601759	27.8696	5.28962e-07	6.27658
chr2.S_203601761	2	203601761	10.2677	0.00170326	2.76872
chr2.S_203601885	2	203601885	28.523	4.00871e-07	6.397
chr2.S_203601909	2	203601909	32.8165	7.0474e-08	7.15197
chr2.S_203602010	2	203602010	4.76998	0.0307684	1.5119
chr2.S_203602027	2	203602027	14.4685	0.000236539	3.6261
chr2.S_203602088	2	203602088	7.34618	0.00763514	2.11718
chr2.S_203602156	2	203602156	6.96503	0.00935262	2.02907
chr2.S_203602239	2	203602239	9.17523	0.00296395	2.52813
chr2.S_203602287	2	203602287	9.16855	0.00296992	2.52726
chr2.S_203602365	2	203602365	3.18636	0.0765873	1.11584
chr2.S_203602389	2	203602389	3.18636	0.0765873	1.11584
chr2.S_203602403	2	203602403	0.21119	0.646604	0.189362
chr2.S_203602458	2	203602458	7.48281	0.00709967	2.14876
chr2.S_203602533	2	203602533	0.21119	0.646604	0.189362
chr2.S_203602699	2	203602699	3.18636	0.0765873	1.11584
chr2.S_203602833	2	203602833	26.6276	8.99433e-07	6.04603
chr2.S_203602880	2	203602880	5.52263	0.0202774	1.69299
chr2.S_203602956	2	203602956	26.6276	8.99433e-07	6.04603
chr2.S_203603076	2	203603076	6.55688	0.0115907	1.93589
chr2.S_203603324	2	203603324	1.34931	0.247527	0.606378
chr2.S_203603338	2	203603338	7.56318	0.00680678	2.16706
chr2.S_203603341	2	203603341	0.21119	0.646604	0.189362
chr2.S_203603387	2	203603387	0.00655719	0.935585	0.0289167
chr2.S_203603389	2	203603389	16.8354	7.14911e-05	4.14575
chr2.S_203603499	2	203603499	24.3553	2.40671e-06	5.61858
chr2.S_203603512	2	203603512	16.8354	7.14911e-05	4.14575
chr2.S_203603586	2	203603586	0.15054	0.698655	0.155737
chr2.S_203603607	2	203603607	0.15054	0.698655	0.155737
chr2.S_203603685	2	203603685	0.361425	0.548931	0.260482
chr2.S_203603781	2	203603781	0.15054	0.698655	0.155737
chr2.S_203603784	2	203603784	0.15054	0.698655	0.155737
chr2.S_203603823	2	203603823	0.15054	0.698655	0.155737
chr2.S_203603970	2	203603970	0.896265	0.345542	0.4615
chr2.S_203603996	2	203603996	22.9269	4.50883e-06	5.34594
chr2.S_203604030	2	203604030	23.1275	4.12662e-06	5.38441
chr2.S_203604131	2	203604131	4.58693	0.0341566	1.46653
chr2.S_203604384	2	203604384	5.6471	0.0189433	1.72254
chr2.S_203604406	2	203604406	4.43689	0.0371076	1.43054
chr2.S_203604411	2	203604411	4.43689	0.0371076	1.43054
chr2.S_203604414	2	203604414	1.16893	0.281624	0.550331
chr2.S_203604480	2	203604480	2.65523	0.105649	0.976133
chr2.S_203604486	2	203604486	2.5185	0.114947	0.939501
chr2.S_203604501	2	203604501	4.43609	0.0371244	1.43034
chr2.S_203604543	2	203604543	0.157248	0.692353	0.159673
chr2.S_203604585	2	203604585	0.157248	0.692353	0.159673
chr2.S_203604588	2	203604588	0.157248	0.692353	0.159673
chr2.S_203604612	2	203604612	17.6887	4.81042e-05	4.31782
chr2.S_203604636	2	203604636	0.00539993	0.941534	0.0261641
chr2.S_203604894	2	203604894	1.68881	0.196058	0.707615
chr2.S_203604910	2	203604910	0.428251	0.514005	0.289033
chr2.S_203604968	2	203604968	16.1843	9.69413e-05	4.01349
chr2.S_203604969	2	203604969	18.8518	2.81711e-05	4.5502
chr2.S_203604983	2	203604983	0.078011	0.780455	0.107652
chr2.S_203605022	2	203605022	8.44573	0.00430783	2.36574
chr2.S_203605153	2	203605153	15.3617	0.00014331	3.84372
chr2.S_203605154	2	203605154	15.3617	0.00014331	3.84372
chr2.S_203605155	2	203605155	16.3539	9.05798e-05	4.04297
chr2.S_203605156	2	203605156	16.4691	8.51596e-05	4.06977
chr2.S_203605177	2	203605177	13.0233	0.000437628	3.3589
chr2.S_203605205	2	203605205	13.6218	0.000327698	3.48453
chr2.S_203605221	2	203605221	11.1485	0.00109754	2.95958
chr2.S_203605222	2	203605222	11.1485	0.00109754	2.95958
chr2.S_203605225	2	203605225	0.618859	0.433104	0.363408
chr2.S_203605226	2	203605226	1.35285	0.247297	0.606781
chr2.S_203605227	2	203605227	1.64803	0.201949	0.694758
chr2.S_203605233	2	203605233	1.35571	0.246448	0.608275
chr2.S_203605234	2	203605234	1.44267	0.232034	0.634448
chr2.S_203605236	2	203605236	1.49192	0.224164	0.649434
chr2.S_203605238	2	203605238	1.26245	0.263291	0.579564
chr2.S_203605244	2	203605244	0.126371	0.722801	0.140981
chr2.S_203605251	2	203605251	8.34825	0.00452468	2.34441
chr2.S_203605280	2	203605280	0.00245564	0.960554	0.0174784
chr2.S_203605323	2	203605323	0.00184659	0.965791	0.0151169
chr2.S_203605327	2	203605327	1.71408	0.192859	0.71476
chr2.S_203605328	2	203605328	8.34825	0.00452468	2.34441
chr2.S_203605333	2	203605333	2.0057	0.159119	0.798278
chr2.S_203605352	2	203605352	0.673275	0.413414	0.383615
chr2.S_203605357	2	203605357	0.00245564	0.960554	0.0174784
chr2.S_203605375	2	203605375	4.32356	0.0396659	1.40158
chr2.S_203605395	2	203605395	8.34825	0.00452468	2.34441
chr2.S_203605404	2	203605404	0.417899	0.519127	0.284726
chr2.S_203605418	2	203605418	0.00245564	0.960554	0.0174784
chr2.S_203605435	2	203605435	1.79487	0.182672	0.738329
chr2.S_203605451	2	203605451	1.47994	0.225987	0.645916
chr2.S_203605486	2	203605486	9.148	0.00302271	2.5196
chr2.S_217655435	2	217655435	7.30651	0.0078111	2.10729
chr2.S_217655647	2	217655647	0.3829	0.537536	0.269592
chr2.S_217655836	2	217655836	0.468529	0.494942	0.305446
chr2.S_217656069	2	217656069	0.181883	0.67055	0.173569
chr2.S_217656119	2	217656119	0.0108269	0.917292	0.0374924
chr2.S_217656121	2	217656121	0.40001	0.528195	0.277206
chr2.S_217656297	2	217656297	16.957	6.75547e-05	4.17034
chr2.S_217656602	2	217656602	0.352864	0.553529	0.25686
chr2.S_217656605	2	217656605	0.690789	0.407507	0.389865
chr2.S_217656633	2	217656633	0.576567	0.449036	0.347719
chr2.S_217656667	2	217656667	0.0108269	0.917292	0.0374924
chr2.S_217656753	2	217656753	2.60201	0.109172	0.961888
chr2.S_217657328	2	217657328	21.5345	8.3731e-06	5.07711
chr2.S_217657486	2	217657486	0.00156889	0.968473	0.0139123
chr2.S_217657734	2	217657734	6.17535	0.0144599	1.83984
chr2.S_217657746	2	217657746	22.4021	5.68893e-06	5.24497
chr2.S_217657852	2	217657852	21.9823	6.85647e-06	5.1639
chr2.S_217657887	2	217657887	21.5345	8.3731e-06	5.07711
chr2.S_217657896	2	217657896	21.9823	6.85647e-06	5.1639
chr2.S_217657931	2	217657931	5.4326	0.0213035	1.67155
chr2.S_217657994	2	217657994	3.59632	0.0601267	1.22093
chr2.S_217658066	2	217658066	4.11589	0.0445245	1.3514
chr2.S_217658083	2	217658083	4.11589	0.0445245	1.3514
chr2.S_217658176	2	217658176	1.41714	0.236045	0.627006
chr2.S_217658194	2	217658194	9.17725	0.00295677	2.52918
chr2.S_217658195	2	217658195	9.17725	0.00295677	2.52918
chr2.S_217658242	2	217658242	9.24641	0.00285841	2.54388
chr2.S_217658293	2	217658293	3.91452	0.0499848	1.30116
chr2.S_217658319	2	217658319	4.0371	0.0465809	1.33179
chr2.S_217658320	2	217658320	6.46445	0.0121782	1.91442
chr2.S_217658330	2	217658330	0.73524	0.392768	0.405864
chr2.S_217658368	2	217658368	16.957	6.75547e-05	4.17034
chr2.S_217658382	2	217658382	3.59632	0.0601267	1.22093
chr2.S_217658404	2	217658404	0.217345	0.641851	0.192566
chr2.S_217658536	2	217658536	0.732163	0.393757	0.404771
chr2.S_217658555	2	217658555	0.732163	0.393757	0.404771
chr2.S_217658566	2	217658566	0.0734135	0.78686	0.104103
chr2.S_217658644	2	217658644	0.198917	0.656338	0.182872
chr2.S_217658655	2	217658655	0.837268	0.361873	0.441443
chr2.S_217658669	2	217658669	0.198917	0.656338	0.182872
chr2.S_217658698	2	217658698	0.732163	0.393757	0.404771
chr2.S_217658782	2	217658782	1.98599	0.161149	0.792773
chr2.S_217658815	2	217658815	0.242902	0.622949	0.205547
chr2.S_217658821	2	217658821	0.390343	0.533214	0.273098
chr2.S_217658848	2	217658848	0.502504	0.479671	0.319056
chr2.S_217658912	2	217658912	5.20491	0.0241492	1.6171
chr2.S_217658915	2	217658915	0.732163	0.393757	0.404771
chr2.S_217658916	2	217658916	1.95109	0.164849	0.782913
chr2.S_217658948	2	217658948	2.82924	0.0949625	1.02245
chr2.S_217658957	2	217658957	0.502504	0.479671	0.319056
chr2.S_217658966	2	217658966	0.732163	0.393757	0.404771
chr2.S_217659181	2	217659181	4.75996	0.0309272	1.50966
chr2.S_217659301	2	217659301	0.827123	0.364789	0.437959
chr2.S_217659418	2	217659418	0.336528	0.562844	0.249612
chr2.S_217659420	2	217659420	9.17725	0.00295677	2.52918
chr2.S_217659669	2	217659669	5.36829	0.0220697	1.6562
chr2.S_217659673	2	217659673	0.220443	0.639489	0.194167
chr2.S_217659823	2	217659823	9.17725	0.00295677	2.52918
chr2.S_217659840	2	217659840	10.2459	0.001722	2.76397
chr2.S_217659883	2	217659883	9.17725	0.00295677	2.52918
chr2.S_217660024	2	217660024	5.36829	0.0220697	1.6562
chr2.S_217660173	2	217660173	5.69506	0.0184541	1.73391
chr2.S_217660318	2	217660318	1.91218	0.169378	0.771144
chr2.S_217660326	2	217660326	5.99192	0.0157377	1.80306
chr2.S_217660400	2	217660400	5.76203	0.0177929	1.74975
chr2.S_217660460	2	217660460	0.0389726	0.843814	0.0737535
chr2.S_217660623	2	217660623	4.59332	0.0341325	1.46683
chr3.S_32107121	3	32107121	16.5619	8.3584e-05	4.07788
chr3.S_32107165	3	32107165	0.375083	0.541342	0.266528
chr3.S_32107199	3	32107199	35.8191	2.09697e-08	7.67841
chr3.S_32107362	3	32107362	22.3537	6.05473e-06	5.21791
chr3.S_32107388	3	32107388	8.27855	0.00474964	2.32334
chr3.S_32107391	3	32107391	8.60743	0.00400062	2.39787
chr3.S_32107413	3	32107413	22.0225	7.05759e-06	5.15134
chr3.S_32107491	3	32107491	34.8775	4.96093e-08	7.30444
chr3.S_32107492	3	32107492	27.7952	7.16418e-07	6.14483
chr3.S_32107501	3	32107501	20.7405	1.20958e-05	4.91737
chr3.S_32107518	3	32107518	4.48588	0.0360795	1.44274
chr3.S_32107524	3	32107524	14.3757	0.000229637	3.63896
chr3.S_32107568	3	32107568	24.217	2.61613e-06	5.58234
chr3.S_32107590	3	32107590	14.3757	0.000229637	3.63896
chr3.S_32107601	3	32107601	5.75635	0.0179057	1.74701
chr3.S_32107613	3	32107613	5.75635	0.0179057	1.74701
chr3.S_32107618	3	32107618	23.628	3.38391e-06	5.47058
chr3.S_32107689	3	32107689	56.5141	8.05747e-12	11.0938
chr3.S_32108692	3	32108692	47.4128	2.42727e-10	9.61488
chr3.S_32110362	3	32110362	13.599	0.000443266	3.35334
chr3.S_32110372	3	32110372	7.43462	0.00784066	2.10565
chr3.S_32110375	3	32110375	9.85408	0.00234692	2.6295
chr3.S_32110377	3	32110377	9.76922	0.00253537	2.59596
chr3.S_32110394	3	32110394	54.6862	1.73776e-11	10.76
chr3.S_32110434	3	32110434	34.3891	3.83291e-08	7.41647
chr3.S_32110437	3	32110437	19.8855	2.1186e-05	4.67395
chr3.S_32110448	3	32110448	6.32465	0.0131263	1.88186
chr3.S_32110454	3	32110454	4.52291	0.0353333	1.45182
chr3.S_32110471	3	32110471	3.65715	0.0583833	1.23371
chr3.S_32110498	3	32110498	4.85651	0.0293027	1.53309
chr3.S_32110501	3	32110501	4.85651	0.0293027	1.53309
chr3.S_32110542	3	32110542	6.32465	0.0131263	1.88186
chr3.S_32110561	3	32110561	58.5595	3.91933e-12	11.4068
chr3.S_32110572	3	32110572	14.8016	0.000186284	3.72983
chr3.S_32110577	3	32110577	12.6657	0.000524584	3.28019
chr3.S_32110578	3	32110578	12.1336	0.00067837	3.16853
chr3.S_32110579	3	32110579	11.4883	0.000935452	3.02898
chr3.S_32110601	3	32110601	6.58123	0.0123593	1.908
chr3.S_32110632	3	32110632	9.56575	0.0024838	2.60488
chr3.S_32110633	3	32110633	4.3479	0.0393474	1.40508
chr3.S_32110654	3	32110654	7.96035	0.00553239	2.25709
chr3.S_32110725	3	32110725	2.04763	0.15553	0.808187
chr3.S_32110733	3	32110733	8.47447	0.0044151	2.35506
chr3.S_32110735	3	32110735	7.96035	0.00553239	2.25709
chr3.S_32110737	3	32110737	5.35283	0.0222704	1.65227
chr3.S_32110754	3	32110754	5.05796	0.0261957	1.58177
chr3.S_32110771	3	32110771	10.6428	0.0014116	2.85029
chr3.S_32110772	3	32110772	21.3303	9.17423e-06	5.03743
chr3.S_32110776	3	32110776	7.16059	0.00841148	2.07513
chr3.S_32110792	3	32110792	20.6009	1.28785e-05	4.89013
chr3.S_32110808	3	32110808	19.9981	1.80554e-05	4.74339
chr3.S_32110882	3	32110882	22.2788	6.44308e-06	5.19091
chr3.S_32110919	3	32110919	16.3672	9.43912e-05	4.02507
chr3.S_32111029	3	32111029	24.7905	6.06189e-06	5.21739
chr3.S_32111036	3	32111036	20.5729	3.00273e-05	4.52248
chr3.S_32111057	3	32111057	7.35061	0.00933229	2.03001
chr3.S_32111059	3	32111059	27.1465	1.7684e-06	5.75242
chr3.S_32111060	3	32111060	38.5666	5.16692e-08	7.28677
chr3.S_32111061	3	32111061	45.5916	1.44136e-09	8.84123
chr3.S_32111080	3	32111080	47.7613	2.03339e-10	9.69178
chr3.S_32111085	3	32111085	45.9902	1.08038e-09	8.96642
chr3.S_32111097	3	32111097	1.93447	0.169087	0.771889
chr3.S_32111140	3	32111140	48.9023	1.26974e-10	9.89628
chr3.S_32111201	3	32111201	48.9023	1.26974e-10	9.89628
chr3.S_32111274	3	32111274	48.9023	1.26974e-10	9.89628
chr3.S_32111283	3	32111283	48.9023	1.26974e-10	9.89628
chr3.S_32111325	3	32111325	1.74855	0.190766	0.7195
chr3.S_32111372	3	32111372	3.04619	0.0832897	1.07941
chr3.S_32111383	3	32111383	4.68338	0.0322834	1.49102
chr3.S_32111402	3	32111402	89.5009	1.76699e-16	15.7528
chr3.S_32111518	3	32111518	2.61795	0.108085	0.966236
chr3.S_32111532	3	32111532	35.924	1.89417e-08	7.72258
chr3.S_32111570	3	32111570	4.68338	0.0322834	1.49102
chr3.S_32111581	3	32111581	33.8952	4.30557e-08	7.36597
chr3.S_32111582	3	32111582	23.7245	4.60538e-06	5.33673
chr3.S_32111584	3	32111584	12.5447	0.000662259	3.17897
chr3.S_32111585	3	32111585	16.6496	0.000102816	3.98794
chr3.S_32111596	3	32111596	2.08595	0.153861	0.812871
chr3.S_32111597	3	32111597	45.0694	3.52577e-09	8.45275
chr3.S_32111599	3	32111599	49.161	1.77607e-09	8.75054
chr3.S_32111600	3	32111600	26.3461	2.17633e-06	5.66228
chr3.S_32111601	3	32111601	10.354	0.00193754	2.71275
chr3.S_32111605	3	32111605	90.3261	1.76771e-16	15.7526
chr3.S_32111638	3	32111638	18.9408	3.33947e-05	4.47632
chr3.S_32111667	3	32111667	91.8427	1.13302e-16	15.9458
chr3.S_32111873	3	32111873	30.3639	2.02852e-07	6.69282
b0424	3	32112046	35.2418	3.1535e-08	7.50121	20/87
chr3.S_66729266	3	66729266	145.5	6.94698e-28	27.1582
chr3.S_66729451	3	66729451	145.5	6.94698e-28	27.1582
chr3.S_66730575	3	66730575	145.5	6.94698e-28	27.1582
chr3.S_66730109	3	66730109	145.5	6.94698e-28	27.1582
chr3.S_66730864	3	66730864	145.5	6.94698e-28	27.1582
chr3.S_66730471	3	66730471	106.376	9.89539e-22	21.0046
chr3.S_66729557	3	66729557	87.2616	6.21374e-18	17.2066
chr3.S_66728713	3	66728713	66.0605	1.5688e-14	13.8044
chr3.S_66728702	3	66728702	60.9	8.8628e-14	13.0524
chr3.S_66728240	3	66728240	60.8688	9.94798e-14	13.0023
chr3.S_66728243	3	66728243	56.6203	5.73763e-13	12.2413
chr3.S_66728653	3	66728653	56.0588	6.88687e-13	12.162
chr3.S_66729695	3	66729695	56.0576	6.9798e-13	12.1562
chr3.S_66728599	3	66728599	55.7321	7.98399e-13	12.0978
chr3.S_66730702	3	66730702	55.1347	1.04082e-12	11.9826
chr3.S_66730077	3	66730077	54.5667	1.30745e-12	11.8836
chr3.S_66730563	3	66730563	54.5667	1.30745e-12	11.8836
chr3.S_66730584	3	66730584	54.5667	1.30745e-12	11.8836
chr3.S_66731378	3	66731378	54.5951	1.32358e-12	11.8783
chr3.S_66729234	3	66729234	54.4296	1.39626e-12	11.855
chr3.S_66729237	3	66729237	54.4296	1.39626e-12	11.855
chr3.S_66730362	3	66730362	53.9602	1.71266e-12	11.7663
chr3.S_66729137	3	66729137	53.8371	1.79627e-12	11.7456
chr3.S_66728276	3	66728276	54.3234	1.96727e-12	11.7061
chr3.S_66730987	3	66730987	50.4864	7.87787e-12	11.1036
chr3.S_66728266	3	66728266	50.7819	9.1462e-12	11.0388
b0436	3	66735208	26.0102	5.72941e-06	5.24189	27/36
chr3.S_66728338	3	66728338	5.16359	0.0237431	1.62446
chr3.S_66729942	3	66729942	4.766	0.0306586	1.51345
chr3.S_66731356	3	66731356	2.92322	0.0882954	1.05406
chr3.S_66730973	3	66730973	2.92322	0.0882954	1.05406
chr3.S_66729523	3	66729523	2.69182	0.101847	0.992051
chr3.S_66729683	3	66729683	2.04792	0.153387	0.814212
chr3.S_66730548	3	66730548	2.03061	0.15513	0.809305
chr3.S_66729944	3	66729944	1.57437	0.210486	0.676776
chr3.S_66731294	3	66731294	1.55525	0.213275	0.671061
chr3.S_211755567	3	211755567	11.1455	0.00110129	2.9581
chr3.S_211756734	3	211756734	16.1925	9.6931e-05	4.01354
chr3.S_211756896	3	211756896	14.3707	0.000230185	3.63792
chr3.S_211757195	3	211757195	2.82804	0.0951283	1.02169
chr3.S_211757338	3	211757338	8.21987	0.00490861	2.30904
chr3.S_211757383	3	211757383	7.67857	0.00653576	2.1847
chr3.S_211757385	3	211757385	3.08542	0.0817301	1.08762
chr3.S_211757426	3	211757426	7.06973	0.00911724	2.04014
chr3.S_211757451	3	211757451	7.98117	0.00570685	2.2436
chr3.S_211757621	3	211757621	1.44453	0.231943	0.634619
chr3.S_211757652	3	211757652	12.0698	0.000719403	3.14303
chr3.S_211757772	3	211757772	4.07509	0.0467883	1.32986
chr3.S_211757998	3	211757998	13.0409	0.000433925	3.36259
chr3.S_211758026	3	211758026	20.5459	1.30513e-05	4.88435
chr3.S_211758087	3	211758087	2.89928	0.0933245	1.03
chr3.S_211758092	3	211758092	5.29532	0.0245491	1.60996
chr3.S_211758158	3	211758158	43.9162	8.27845e-10	9.08205
chr3.S_211758241	3	211758241	42.7834	1.30291e-09	8.88509
chr3.S_211758293	3	211758293	42.7896	1.32576e-09	8.87753
chr3.S_211758294	3	211758294	39.9594	4.34004e-09	8.36251
chr3.S_211758302	3	211758302	12.7419	0.000504241	3.29736
chr3.S_211758321	3	211758321	2.26711	0.137066	0.863071
chr3.S_211758324	3	211758324	0.906291	0.343738	0.463773
chr3.S_211758325	3	211758325	3.78404	0.0550887	1.25894
chr3.S_211758326	3	211758326	3.03107	0.0851014	1.07006
chr3.S_211758327	3	211758327	5.30397	0.0239423	1.62083
chr3.S_211758360	3	211758360	8.73855	0.00414795	2.38217
chr3.S_211758362	3	211758362	7.10341	0.00944066	2.025
chr3.S_211758363	3	211758363	7.6508	0.0072279	2.14099
chr3.S_211758364	3	211758364	13.1719	0.000512754	3.29009
chr3.S_211758450	3	211758450	15.616	0.000127098	3.89586
chr3.S_211758473	3	211758473	11.4688	0.00108888	2.96302
chr3.S_211758478	3	211758478	9.19641	0.0030081	2.52171
chr3.S_211758940	3	211758940	6.04051	0.0153861	1.81287
chr4.S_167081234	4	167081234	3.55344	0.0618208	1.20887
chr4.S_167081348	4	167081348	6.6388	0.0110947	1.95489
chr4.S_167081352	4	167081352	6.6388	0.0110947	1.95489
chr4.S_167081387	4	167081387	0.311364	0.577804	0.238219
chr4.S_167081443	4	167081443	6.55604	0.0116234	1.93467
chr4.S_167081479	4	167081479	6.53685	0.0117155	1.93124
chr4.S_167081484	4	167081484	6.53685	0.0117155	1.93124
chr4.S_167081553	4	167081553	7.95379	0.0055513	2.25561
chr4.S_167081577	4	167081577	15.2356	0.000152119	3.81782
chr4.S_167081585	4	167081585	6.53685	0.0117155	1.93124
chr4.S_167081664	4	167081664	0.932607	0.335979	0.473687
chr4.S_167081666	4	167081666	0.603225	0.438761	0.357772
chr4.S_167081725	4	167081725	0.51417	0.474626	0.323649
chr4.S_167081748	4	167081748	5.6394	0.0190231	1.72072
chr4.S_167081807	4	167081807	1.73721	0.189811	0.721679
chr4.S_167081870	4	167081870	5.51332	0.020381	1.69077
chr4.S_167082228	4	167082228	1.15025	0.285483	0.54442
chr4.S_167082467	4	167082467	0.0122739	0.911976	0.0400165
chr4.S_167082470	4	167082470	4.40328	0.0380214	1.41997
chr4.S_167082581	4	167082581	6.59014	0.0113866	1.94361
chr4.S_167082950	4	167082950	11.5463	0.000901424	3.04507
chr4.S_167082974	4	167082974	2.34776	0.127931	0.893024
chr4.S_167082992	4	167082992	2.88792	0.0916753	1.03775
chr4.S_167083461	4	167083461	0.803296	0.371779	0.429715
chr4.S_167083492	4	167083492	1.32899	0.251167	0.600037
chr4.S_167083518	4	167083518	3.4753	0.0645644	1.19001
chr4.S_167083566	4	167083566	2.21706	0.138915	0.857251
chr4.S_167083584	4	167083584	2.21706	0.138915	0.857251
chr4.S_167083592	4	167083592	2.17393	0.142803	0.845262
chr4.S_167083699	4	167083699	9.32362	0.00277773	2.55631
chr4.S_167083703	4	167083703	3.54083	0.0621287	1.20671
chr4.S_167083706	4	167083706	2.19307	0.14111	0.850443
chr4.S_167083708	4	167083708	3.54083	0.0621287	1.20671
chr4.S_167083935	4	167083935	1.50939	0.221979	0.653687
chr4.S_167084464	4	167084464	3.28843	0.0722078	1.14142
chr4.S_167084487	4	167084487	1.95594	0.164348	0.784236
chr4.S_167084495	4	167084495	1.95625	0.164296	0.784372
chr4.S_167084522	4	167084522	2.33352	0.129045	0.88926
chr4.S_167084542	4	167084542	13.2622	0.000398628	3.39943
chr4.S_167084550	4	167084550	0.4625	0.498374	0.302445
chr4.S_167084554	4	167084554	0.0255253	0.873473	0.0587505
chr4.S_167084585	4	167084585	0.316791	0.57545	0.239993
chr4.S_167084604	4	167084604	0.303948	0.58328	0.234123
chr4.S_167085012	4	167085012	9.78646	0.00217716	2.66211
chr4.S_167085025	4	167085025	21.3386	1.20816e-05	4.91788
chr4.S_167085133	4	167085133	7.8549	0.00600908	2.22119
chr4.S_167085192	4	167085192	29.3519	3.74892e-07	6.42609
chr4.S_167085221	4	167085221	29.2555	4.27078e-07	6.36949
b0597	4	167086030	19.7893	2.03519e-05	4.6914	5/50
chr4.S_167087053	4	167087053	31.5928	1.63342e-07	6.7869
chr5.S_172287268	5	172287268	8.33603	0.00475442	2.3229
chr5.S_172288100	5	172288100	13.5322	0.000392642	3.406
chr5.S_172288267	5	172288267	10.056	0.0019679	2.706
chr5.S_172288455	5	172288455	9.44624	0.0026845	2.57114
chr5.S_172288558	5	172288558	1.01243	0.317942	0.497652
chr5.S_172288587	5	172288587	0.565787	0.453705	0.343227
chr5.S_172288590	5	172288590	1.70134	0.194992	0.709983
chr5.S_172288712	5	172288712	12.3423	0.000609698	3.21489
chr5.S_172288778	5	172288778	24.1108	2.69856e-06	5.56887
chr5.S_172288779	5	172288779	6.45456	0.0122522	1.91179
chr5.S_172288808	5	172288808	27.9408	5.13199e-07	6.28971
chr5.S_172288815	5	172288815	24.758	2.01893e-06	5.69488
chr5.S_172288817	5	172288817	24.1108	2.69856e-06	5.56887
chr5.S_172289122	5	172289122	9.00315	0.00334087	2.47614
chr5.S_172289332	5	172289332	3.07287	0.0830521	1.08065
chr5.S_172289369	5	172289369	7.0209	0.00933912	2.02969
chr5.S_172289524	5	172289524	0.856038	0.356839	0.447528
chr5.S_172289558	5	172289558	0.00995373	0.920711	0.0358764
chr5.S_172290168	5	172290168	11.1661	0.0011086	2.95522
chr5.S_172290192	5	172290192	37.0022	1.22992e-08	7.91012
chr5.S_172290196	5	172290196	37.0022	1.22992e-08	7.91012
chr5.S_172290204	5	172290204	3.71298	0.0564582	1.24827
chr5.S_172290232	5	172290232	31.9642	9.62359e-08	7.01666
chr5.S_172290323	5	172290323	34.1209	3.92758e-08	7.40588
chr5.S_172290357	5	172290357	0.432358	0.512024	0.29071
chr5.S_172290384	5	172290384	35.9714	1.88597e-08	7.72447
chr5.S_172290385	5	172290385	1.38076	0.242259	0.61572
chr5.S_172290401	5	172290401	1.37019	0.244006	0.612599
chr5.S_172290454	5	172290454	3.54751	0.0618862	1.20841
chr5.S_172290609	5	172290609	0.45366	0.502309	0.299029
chr5.S_172290626	5	172290626	0.137329	0.711776	0.147657
chr5.S_172290627	5	172290627	0.0630764	0.802358	0.0956316
chr5.S_172290670	5	172290670	28.3719	4.35948e-07	6.36057
chr5.S_172290671	5	172290671	26.3884	1.06244e-06	5.97369
chr5.S_172290734	5	172290734	17.7886	4.59324e-05	4.33788
chr5.S_172290770	5	172290770	17.7886	4.59324e-05	4.33788
chr5.S_172290771	5	172290771	17.7886	4.59324e-05	4.33788
chr5.S_172290772	5	172290772	34.4963	3.37176e-08	7.47214
chr5.S_172290813	5	172290813	20.3551	1.42247e-05	4.84696
chr5.S_172290831	5	172290831	3.31272	0.071064	1.14835
chr5.S_172290844	5	172290844	35.7545	2.02784e-08	7.69297
chr5.S_172290848	5	172290848	35.7545	2.02784e-08	7.69297
chr5.S_172290852	5	172290852	13.1429	0.000505905	3.29593
chr5.S_172290853	5	172290853	4.32533	0.0411102	1.38605
chr5.S_172290876	5	172290876	0.240752	0.624914	0.20418
chr5.S_172290880	5	172290880	25.2697	1.67072e-06	5.7771
chr5.S_172290889	5	172290889	34.8161	3.18125e-08	7.4974
chr5.S_172290898	5	172290898	29.9672	2.36147e-07	6.62682
chr5.S_172290909	5	172290909	0.0387415	0.844346	0.0734797
chr5.S_172290922	5	172290922	0.862022	0.355283	0.449426
chr5.S_172290924	5	172290924	0.360206	0.549697	0.259877
chr5.S_172291249	5	172291249	5.40959	0.0215865	1.66582
chr5.S_172291253	5	172291253	0.0511005	0.821514	0.0853849
chr5.S_172291255	5	172291255	0.0511005	0.821514	0.0853849
chr5.S_172291257	5	172291257	0.0511005	0.821514	0.0853849
chr5.S_172291258	5	172291258	0.0511005	0.821514	0.0853849
chr5.S_172291259	5	172291259	0.0511005	0.821514	0.0853849
chr5.S_172291265	5	172291265	41.705	2.46709e-09	8.60781
chr5.S_172291280	5	172291280	11.0046	0.00119046	2.92429
chr5.S_172291281	5	172291281	8.94805	0.00333752	2.47658
chr5.S_172291287	5	172291287	2.38176	0.125228	0.902298
chr5.S_172291344	5	172291344	3.25426	0.0736083	1.13307
chr5.S_172291357	5	172291357	28.8671	5.70612e-07	6.24366
chr5.S_172291360	5	172291360	31.6473	2.15889e-07	6.66577
chr5.S_172291380	5	172291380	21.7184	1.14385e-05	4.94163
chr5.S_172291403	5	172291403	16.78	0.000112559	3.94862
b0713	5	172291431	31.5961	1.2229e-07	6.91261	23/104
chr5.S_172291448	5	172291448	0.730432	0.396451	0.401811
chr5.S_172291564	5	172291564	0.29644	0.588592	0.230186
chr5.S_172291568	5	172291568	20.3809	1.95806e-05	4.70817
chr5.S_172291569	5	172291569	23.5348	4.41781e-06	5.35479
chr5.S_172291614	5	172291614	3.43924	0.0659306	1.18091
chr5.S_172291664	5	172291664	33.3308	5.42158e-08	7.26587
chr5.S_172291674	5	172291674	10.3651	0.00162205	2.78994
chr5.S_172292398	5	172292398	9.7106	0.00225866	2.64615
chr5.S_172292758	5	172292758	0.384262	0.536416	0.270498
chr5.S_172292860	5	172292860	34.5662	3.32288e-08	7.47849
chr5.S_172292868	5	172292868	7.087	0.00874489	2.05825
chr5.S_172292879	5	172292879	0.000735742	0.978459	0.00945756
chr5.S_172292892	5	172292892	0.463382	0.497258	0.303418
chr5.S_172293089	5	172293089	10.3651	0.00162205	2.78994
chr5.S_172293129	5	172293129	0.463382	0.497258	0.303418
chr5.S_172293860	5	172293860	39.4011	4.75707e-09	8.32266
chr5.S_172293861	5	172293861	0.0209675	0.885092	0.0530117
chr5.S_172293904	5	172293904	10.3651	0.00162205	2.78994
chr5.S_172293976	5	172293976	36.4091	1.55907e-08	7.80713
chr5.S_172294082	5	172294082	10.3651	0.00162205	2.78994
chr5.S_172294123	5	172294123	34.5661	3.2776e-08	7.48444
chr5.S_172294179	5	172294179	0.330675	0.566256	0.246987
chr5.S_172294330	5	172294330	11.1564	0.00109976	2.9587
chr5.S_172294403	5	172294403	0.076335	0.782766	0.106368
chr5.S_172294558	5	172294558	9.32681	0.00273991	2.56226
chr5.S_172294686	5	172294686	38.3934	7.07702e-09	8.15015
chr5.S_172294693	5	172294693	35.5011	2.24569e-08	7.64865
chr5.S_172294702	5	172294702	35.5011	2.24569e-08	7.64865
chr5.S_172294711	5	172294711	38.3934	7.07702e-09	8.15015
chr5.S_172294777	5	172294777	10.5667	0.00146633	2.83377
chr5.S_172294803	5	172294803	36.7395	1.634e-08	7.78675
chr5.S_172294805	5	172294805	5.82729	0.0204483	1.68934
chr5.S_172294814	5	172294814	21.3134	2.5917e-05	4.58642
chr5.S_172294815	5	172294815	0.990099	0.325852	0.486979
chr5.S_172294820	5	172294820	28.4451	9.59209e-07	6.01809
chr5.S_172294856	5	172294856	7.77019	0.0077531	2.11052
chr5.S_172294887	5	172294887	35.5011	2.24569e-08	7.64865
chr6.S_120879772	6	120879772	0.0148243	0.903281	0.0441772
chr6.S_120879880	6	120879880	4.16964e-05	0.994858	0.002239
chr6.S_120880112	6	120880112	0.171838	0.679167	0.168023
chr6.S_120880311	6	120880311	0.00900875	0.924529	0.0340795
chr6.S_120880359	6	120880359	0.209845	0.647654	0.188657
chr6.S_120880726	6	120880726	0.588858	0.444368	0.352257
chr6.S_120880981	6	120880981	0.209845	0.647654	0.188657
chr6.S_120881010	6	120881010	0.634439	0.427184	0.369385
chr6.S_120881015	6	120881015	0.00503091	0.943563	0.0252289
chr6.S_120881023	6	120881023	0.00900875	0.924529	0.0340795
chr6.S_120881318	6	120881318	0.0115485	0.914587	0.0387751
chr6.S_120881612	6	120881612	0.00503091	0.943563	0.0252289
chr6.S_120882119	6	120882119	0.00724058	0.93232	0.0304348
chr6.S_120882163	6	120882163	0.227439	0.63423	0.197753
chr6.S_120882218	6	120882218	0.00900875	0.924529	0.0340795
chr6.S_120882329	6	120882329	1.70361	0.201125	0.696535
chr6.S_120882644	6	120882644	7.4858	0.00803873	2.09481
chr6.S_120882663	6	120882663	0.00183454	0.965909	0.0150636
chr6.S_120882670	6	120882670	0.00716455	0.932683	0.0302657
chr6.S_120882683	6	120882683	4.04759	0.048383	1.31531
chr6.S_120883003	6	120883003	4.14707	0.0447126	1.34957
chr6.S_120883336	6	120883336	3.91858	0.0498678	1.30218
chr6.S_120883341	6	120883341	1.19154	0.277038	0.55746
chr6.S_120883386	6	120883386	3.8473	0.0519634	1.2843
chr6.S_120883416	6	120883416	0.0082011	0.927985	0.0324591
chr6.S_120883417	6	120883417	0.0083564	0.927309	0.0327754
chr6.S_120883748	6	120883748	7.58051	0.00719747	2.14282
chr6.S_120883782	6	120883782	11.1604	0.00112201	2.95
chr6.S_120883953	6	120883953	1.42982	0.235561	0.627897
b0791	6	120884257	9.84235	0.00216622	2.6643	2/33
chr6.S_120885399	6	120885399	4.59517	0.0340467	1.46792
chr6.S_120885445	6	120885445	6.01689	0.0155601	1.80799
chr6.S_120885446	6	120885446	6.39039	0.0127201	1.89551
chr9.S_139928056	9	139928056	0.655898	0.420922	0.375798
b1122	9	139929066	3.83827	0.0531903	1.27417	10/57
chr9.S_139929390	9	139929390	0.524175	0.470883	0.327087
chr9.S_139929632	9	139929632	0.584116	0.446468	0.35021
chr9.S_139929633	9	139929633	2.20023	0.141074	0.850554
chr9.S_139929856	9	139929856	5.60106	0.0199159	1.7008
chr9.S_139929877	9	139929877	6.37648	0.012891	1.88971
chr9.S_139929934	9	139929934	1.32893	0.251111	0.600135
chr9.S_139929939	9	139929939	0.213968	0.644461	0.190804
chr9.S_139929965	9	139929965	1.62181	0.205476	0.687238
chr9.S_139930013	9	139930013	1.22562	0.271313	0.56653
chr9.S_139930081	9	139930081	0.978707	0.324709	0.488505
chr9.S_139930167	9	139930167	0.0225125	0.881119	0.0549654
chr9.S_139930169	9	139930169	0.655015	0.42064	0.37609
chr9.S_139930170	9	139930170	2.59611	0.110969	0.954798
chr9.S_139930174	9	139930174	0.501528	0.480888	0.317956
chr9.S_139930210	9	139930210	0.00820557	0.928106	0.0324026
chr9.S_139930225	9	139930225	11.893	0.000772209	3.11226
chr9.S_139930243	9	139930243	1.46685	0.229916	0.638431
chr9.S_139930249	9	139930249	2.31989	0.13205	0.879263
chr9.S_139930251	9	139930251	0.791304	0.376753	0.423943
chr9.S_139930252	9	139930252	6.34523	0.0136884	1.86365
chr9.S_139930258	9	139930258	13.5943	0.000346592	3.46018
chr9.S_139930371	9	139930371	0.0716874	0.789426	0.102689
chr9.S_139930372	9	139930372	0.529078	0.468629	0.329171
chr9.S_139930374	9	139930374	0.142283	0.706763	0.150726
chr9.S_139930375	9	139930375	0.573447	0.450621	0.346188
chr9.S_139930419	9	139930419	0.235706	0.628175	0.201919
chr9.S_139930425	9	139930425	1.9454	0.165518	0.781155
chr9.S_139930502	9	139930502	0.338845	0.561505	0.250646
chr9.S_139930559	9	139930559	5.38561	0.0218605	1.66034
chr9.S_139930561	9	139930561	0.856317	0.356499	0.447941
chr9.S_139930584	9	139930584	3.94296	0.0493105	1.30706
chr9.S_139930585	9	139930585	3.88957	0.0508127	1.29403
chr9.S_139930587	9	139930587	3.76563	0.0545675	1.26307
chr9.S_139930647	9	139930647	2.89929	0.0921888	1.03532
chr9.S_139930648	9	139930648	1.44082	0.233381	0.631935
chr9.S_139930657	9	139930657	1.36823	0.24582	0.609383
chr9.S_139930670	9	139930670	6.27035	0.0142852	1.84511
chr9.S_139931280	9	139931280	0.552662	0.459106	0.338087
chr9.S_139931513	9	139931513	0.57308	0.450671	0.34614
chr9.S_139931663	9	139931663	2.57495	0.111287	0.953555
chr9.S_139931767	9	139931767	0.0927905	0.761154	0.118528
chr9.S_139931868	9	139931868	0.414715	0.520952	0.283203
chr9.S_139931879	9	139931879	1.58124	0.212026	0.673611
chr9.S_139932107	9	139932107	0.385469	0.535812	0.270988
chr9.S_139932108	9	139932108	0.00670386	0.93488	0.0292443
chr9.S_139932109	9	139932109	0.00492002	0.944196	0.024938
chr9.S_139932142	9	139932142	0.570773	0.45147	0.345371
chr9.S_139932160	9	139932160	0.0425952	0.83682	0.077368
chr9.S_139932527	9	139932527	1.37366	0.244943	0.610935
chr9.S_139932530	9	139932530	0.000519095	0.98188	0.00794177
chr9.S_139932558	9	139932558	1.29622	0.257032	0.590013
chr9.S_139932729	9	139932729	0.002011	0.964386	0.0157493
chr9.S_139932751	9	139932751	8.92712e-07	0.999251	0.000325533
chr9.S_139932784	9	139932784	0.0296996	0.86365	0.063662
chr9.S_139932852	9	139932852	0.00791133	0.929372	0.0318104
chr10.S_141505967	10	141505967	1.98575	0.161484	0.791871
chr10.S_141506008	10	141506008	0.872769	0.352274	0.453119
chr10.S_141506118	10	141506118	2.18631	0.14168	0.848692
chr10.S_141506121	10	141506121	1.85833	0.175174	0.756531
chr10.S_141506124	10	141506124	2.18631	0.14168	0.848692
chr10.S_141506135	10	141506135	0.755098	0.386481	0.412872
chr10.S_141506175	10	141506175	12.3923	0.000596388	3.22447
chr10.S_141506186	10	141506186	12.3923	0.000596388	3.22447
chr10.S_141506209	10	141506209	12.3923	0.000596388	3.22447
chr10.S_141506318	10	141506318	7.48657	0.00717698	2.14406
chr10.S_141506322	10	141506322	1.5992	0.208642	0.680598
chr10.S_141506350	10	141506350	11.0432	0.00115862	2.93606
chr10.S_141506366	10	141506366	11.4593	0.000940987	3.02642
chr10.S_141506372	10	141506372	2.48796	0.117169	0.931186
chr10.S_141506385	10	141506385	3.71455	0.0561216	1.25087
chr10.S_141506397	10	141506397	2.48796	0.117169	0.931186
chr10.S_141506414	10	141506414	0.0792801	0.778727	0.108615
chr10.S_141506421	10	141506421	1.19194	0.276958	0.557586
chr10.S_141506443	10	141506443	2.15173	0.144941	0.838809
chr10.S_141506453	10	141506453	0.756459	0.38612	0.413278
chr10.S_141506517	10	141506517	1.34223	0.248764	0.604212
chr10.S_141506528	10	141506528	1.74324	0.189067	0.723385
chr10.S_141506542	10	141506542	2.94395	0.0886384	1.05238
chr10.S_141506560	10	141506560	1.04471	0.308672	0.510503
chr10.S_141506563	10	141506563	17.1767	6.09901e-05	4.21474
chr10.S_141506695	10	141506695	0.484745	0.487763	0.311791
chr10.S_141506716	10	141506716	9.64149	0.00233901	2.63097
chr10.S_141506852	10	141506852	12.2084	0.000674486	3.17103
chr10.S_141506859	10	141506859	14.5019	0.000224574	3.64864
chr10.S_141506887	10	141506887	7.30605	0.00781301	2.10718
chr10.S_141506945	10	141506945	0.260932	0.610533	0.214291
chr10.S_141506949	10	141506949	0.799394	0.373511	0.427697
chr10.S_141506969	10	141506969	14.8563	0.000181499	3.74113
chr10.S_141507054	10	141507054	13.5429	0.000349454	3.45661
chr10.S_141507074	10	141507074	12.9739	0.000448251	3.34848
chr10.S_141507100	10	141507100	0.654322	0.42005	0.376699
chr10.S_141507107	10	141507107	3.213	0.0753993	1.12263
chr10.S_141507154	10	141507154	3.65865	0.0581036	1.2358
chr10.S_141507178	10	141507178	4.5333	0.0352349	1.45303
chr10.S_141507508	10	141507508	19.2134	2.38822e-05	4.62192
chr10.S_141507526	10	141507526	2.19931	0.142051	0.847555
chr10.S_141507714	10	141507714	12.9955	0.000444723	3.35191
chr10.S_141507734	10	141507734	1.34963	0.247471	0.606475
chr10.S_141507941	10	141507941	0.677034	0.412269	0.384819
chr10.S_141508102	10	141508102	0.626616	0.430064	0.366467
chr10.S_141508817	10	141508817	2.51302	0.115396	0.937809
chr10.S_141509414	10	141509414	21.0095	1.08527e-05	4.96446
chr10.S_141509433	10	141509433	4.65661	0.032831	1.48372
chr10.S_141509459	10	141509459	1.58241	0.210669	0.676399
chr10.S_141509492	10	141509492	0.130929	0.718087	0.143823
chr10.S_141509534	10	141509534	0.167446	0.683065	0.165538
chr10.S_141509563	10	141509563	26.0962	1.13047e-06	5.94674
chr10.S_141509642	10	141509642	36.5289	1.48602e-08	7.82797
chr10.S_141509645	10	141509645	36.5289	1.48602e-08	7.82797
chr10.S_141509681	10	141509681	12.9739	0.000448251	3.34848
chr10.S_141510014	10	141510014	7.1162	0.00877186	2.05691
chr10.S_141510032	10	141510032	14.1265	0.000312709	3.50486
chr10.S_141510052	10	141510052	13.4382	0.000431029	3.36549
chr10.S_141510074	10	141510074	1.08509	0.299495	0.52361
chr10.S_141510351	10	141510351	0.000122568	0.991192	0.00384242
chr10.S_141510354	10	141510354	29.6493	2.79239e-07	6.55402
chr10.S_141510371	10	141510371	25.1046	2.18307e-06	5.66093
chr10.S_141510372	10	141510372	2.25334	0.137076	0.863037
chr10.S_141510373	10	141510373	26.0772	1.30009e-06	5.88603
chr10.S_141510449	10	141510449	37.8844	9.90117e-09	8.00431
chr10.S_141510472	10	141510472	27.7052	7.6393e-07	6.11695
chr10.S_141510483	10	141510483	10.0567	0.00195444	2.70898
chr10.S_141510491	10	141510491	2.83613	0.0945844	1.02418
chr10.S_141510513	10	141510513	7.72545	0.0066568	2.17673
chr10.S_141510517	10	141510517	1.84909	0.17628	0.753798
chr10.S_141510589	10	141510589	1.66253	0.200459	0.697974
b1217	10	141510710	10.3328	0.00178593	2.74814	26/72
b1243	10	148730672	1.80414	0.184445	0.734133	8/16
chr10.S_148731078	10	148731078	23.8013	6.07828e-06	5.21622
chr10.S_148731114	10	148731114	11.7032	0.000917936	3.03719
chr10.S_148731940	10	148731940	1.16272	0.285219	0.544822
chr10.S_148732044	10	148732044	6.49922	0.0126548	1.89774
chr10.S_148732092	10	148732092	1.568	0.212763	0.672105
chr10.S_148732117	10	148732117	5.78408	0.0180299	1.74401
chr10.S_148732171	10	148732171	0.061871	0.804003	0.0947425
chr10.S_148732223	10	148732223	0.0573157	0.811224	0.0908594
chr10.S_148732325	10	148732325	0.481766	0.489411	0.310326
chr10.S_148732344	10	148732344	1.99983	0.160586	0.794293
chr10.S_148732361	10	148732361	1.86132	0.175874	0.754799
chr10.S_148732371	10	148732371	0.0375003	0.846839	0.0721992
chr10.S_148732548	10	148732548	2.48931	0.117781	0.928926
chr10.S_148732648	10	148732648	0.189127	0.664439	0.177545
chr10.S_148732815	10	148732815	0.0116641	0.914192	0.0389626
chr1.S_202917579	1	202917579	0.158517	0.692095	0.159834
chr1.S_202917593	1	202917593	0.355509	0.553331	0.257015
chr1.S_202917629	1	202917629	6.08937	0.0152474	1.8168
chr1.S_202917640	1	202917640	0.00687908	0.934218	0.029552
chr1.S_202917665	1	202917665	0.0728627	0.788188	0.10337
b0110	1	202917742	8.96383	0.0035104	2.45464	14/61
chr1.S_202919116	1	202919116	13.6034	0.000329708	3.48187
chr1.S_202919170	1	202919170	16.3211	9.30962e-05	4.03107
chr1.S_202919183	1	202919183	5.06312	0.027054	1.56777
chr1.S_202919184	1	202919184	0.055919	0.813629	0.0895737
chr1.S_202919228	1	202919228	0.746714	0.389135	0.4099
chr1.S_202919271	1	202919271	7.37815	0.00750078	2.12489
chr1.S_202919272	1	202919272	7.37815	0.00750078	2.12489
chr1.S_202919273	1	202919273	4.36195	0.0387317	1.41193
chr1.S_202919319	1	202919319	7.37815	0.00750078	2.12489
chr1.S_202919336	1	202919336	0.351526	0.554339	0.256224
chr1.S_202919376	1	202919376	13.6034	0.000329708	3.48187
chr1.S_202919379	1	202919379	13.6034	0.000329708	3.48187
chr1.S_202919443	1	202919443	4.15842	0.0435194	1.36132
chr1.S_202919444	1	202919444	4.81409	0.030062	1.52198
chr1.S_202919462	1	202919462	2.53173	0.114187	0.942383
chr1.S_202919463	1	202919463	2.19635	0.140834	0.851291
chr1.S_202919533	1	202919533	1.1795	0.279468	0.553667
chr1.S_202919541	1	202919541	2.33123	0.12925	0.888569
chr1.S_202919543	1	202919543	2.17309	0.14288	0.845029
chr1.S_202919545	1	202919545	4.26311	0.0410332	1.38686
chr1.S_202919547	1	202919547	1.10525	0.295082	0.530057
chr1.S_202919549	1	202919549	1.10525	0.295082	0.530057
chr1.S_202919678	1	202919678	1.42533	0.234719	0.629453
chr1.S_202919767	1	202919767	0.118605	0.731182	0.135975
chr1.S_202919777	1	202919777	9.27834	0.00288107	2.54045
chr1.S_202919780	1	202919780	12.3898	0.000616038	3.21039
chr1.S_202919783	1	202919783	1.06622	0.303734	0.517507
chr1.S_202919843	1	202919843	3.55548	0.0615637	1.21068
chr1.S_202919960	1	202919960	24.2972	3.20601e-06	5.49404
chr1.S_202920029	1	202920029	3.26078	0.0732514	1.13518
chr1.S_202920215	1	202920215	20.8034	1.16898e-05	4.93219
chr1.S_202920340	1	202920340	6.95311	0.00947433	2.02345
chr1.S_202920366	1	202920366	16.0115	0.000108898	3.96298
chr1.S_202920490	1	202920490	0.234275	0.62918	0.201225
chr1.S_202920493	1	202920493	21.3148	9.18306e-06	5.03701
chr1.S_202920524	1	202920524	0.269879	0.60429	0.218755
chr1.S_202920553	1	202920553	1.52569	0.21897	0.659614
chr1.S_202920721	1	202920721	6.48687	0.012061	1.91862
chr1.S_202920733	1	202920733	15.8176	0.000114765	3.94019
chr1.S_202920924	1	202920924	0.286978	0.593072	0.226893
chr1.S_202921192	1	202921192	2.78591	0.0974847	1.01106
chr1.S_202921201	1	202921201	1.72619	0.191212	0.718486
chr1.S_202921207	1	202921207	14.7466	0.000190626	3.71982
chr1.S_202921282	1	202921282	0.916133	0.340256	0.468195
chr1.S_202921283	1	202921283	0.916133	0.340256	0.468195
chr1.S_202921347	1	202921347	2.99851	0.0856952	1.06704
chr1.S_202921361	1	202921361	0.916133	0.340256	0.468195
chr1.S_202921438	1	202921438	6.14923	0.014426	1.84086
chr1.S_202921463	1	202921463	14.2741	0.000240316	3.61922
chr1.S_202921557	1	202921557	4.63484	0.0332499	1.47821
chr1.S_202921562	1	202921562	8.77262	0.00366086	2.43642
chr1.S_202921911	1	202921911	2.74429	0.100014	0.999938
chr1.S_202921913	1	202921913	2.64206	0.106509	0.972613
chr1.S_202922483	1	202922483	2.2587	0.135291	0.86873
chr1.S_202922517	1	202922517	1.48931	0.224549	0.648689
